# Supplementary material
Source: MDPI journal article supplement (https://www.mdpi.com/2297-8739/11/4/110)
Supplement: s1 [file s1]

# Preparation of polysilsesquioxane-based CO<sub>2</sub> separation membrane with thermally degradable succinic anhydride and urea units

Katsuhiro Horata,<sup>1</sup> Tsubasa Yoshio,<sup>1</sup> Ryuto Miyazaki,<sup>1</sup> Yohei Adachi,<sup>1</sup> Masakoto Kanezashi,<sup>2</sup> Toshinori Tsuru,<sup>\*,2</sup> Joji Ohshita<sup>\*,1,3</sup>

<sup>1</sup>*Smart Innovation Program, Graduate School of Advanced Science and Engineering, Hiroshima University, Higashi-Hiroshima 739-8527, Japan*

<sup>2</sup>*Chemical Engineering Program, Graduate School of Advanced Science and Engineering, Hiroshima University, Higashi-Hiroshima 739-8527, Japan*

<sup>3</sup>*Division of Materials Model-Based Research, Digital Monozukuri (Manufacturing) Education and Research Center, Hiroshima University, Higashi-Hiroshima 739-0046, Japan*

## Supporting Information

**Figure S1.** Progress of sol formation from TESPS/BTESE (a) and TESPU/BTESE (b) 1/1 mixtures monitored by DLS measurements at different reaction times ----- pS2

**Figure S2.** Nitrogen adsorption isotherms for TESPS/BTESE and TESPU/BTESE gels ----- pS3

**Figure S3.** Temperature dependent gas permeances of TESPS/BTESE and TESPU/BTESE membranes calcined at different temperatures ----- pS4

**Figure S4.** Comparison of performance of TESPS/BTESE (350) and TESPU/BTESE (300) membranes and that of mix-matrix-membranes and polymer-based membranes, reported previously ----- pS6

**Table S1.** Activation energies for gas permeation of TESPS/BTESE and TESPU/BTESE membranes ----- pS6

**References** ----- pS7

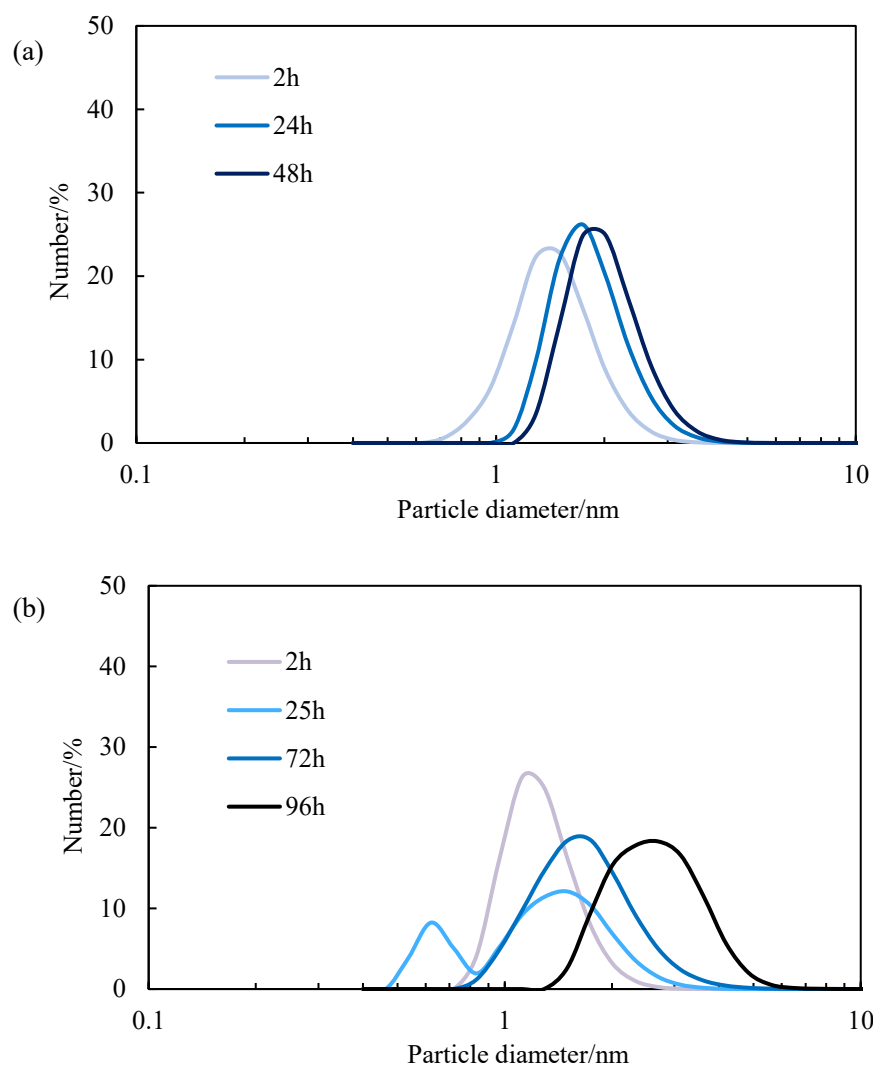

**Figure S1.** Progress of sol formation from (a) TESPS/BTESE and (b) TESPU/BTESE 1/1 mixtures monitored by DLS measurements at different reaction times.

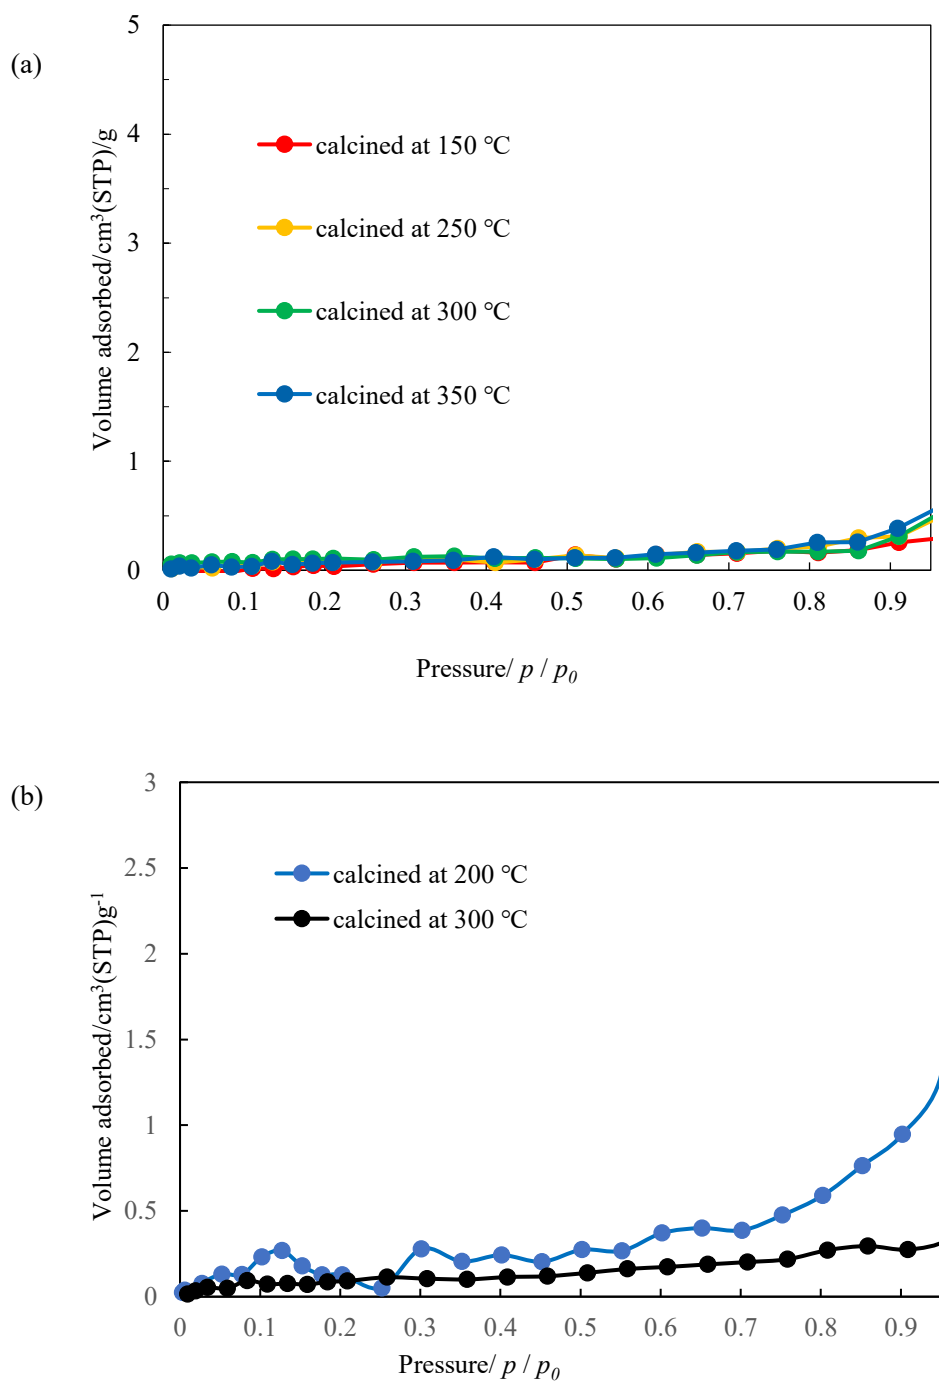

**Figure S2.** Nitrogen adsorption isotherms for (a) TESPS/BTESE and (b) TESPUs/BTESE gels calcined at different temperatures.

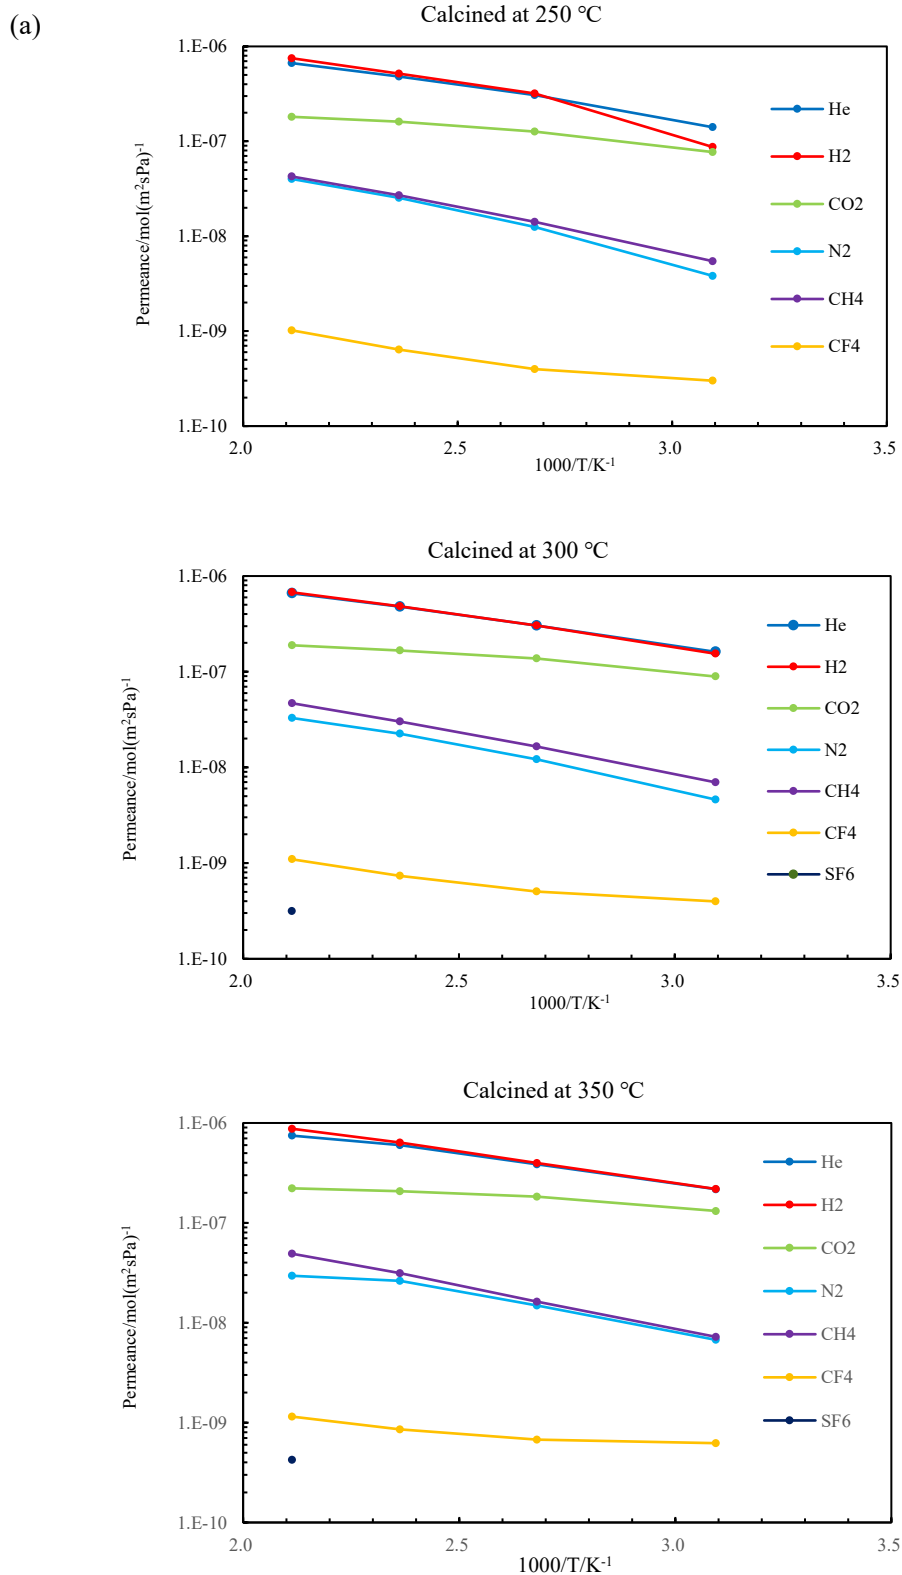

**Figure S3.** Temperature dependent gas permeances of (a) TESPS/BTESE and (b) TESP/BTESE membranes calcined at different temperatures.

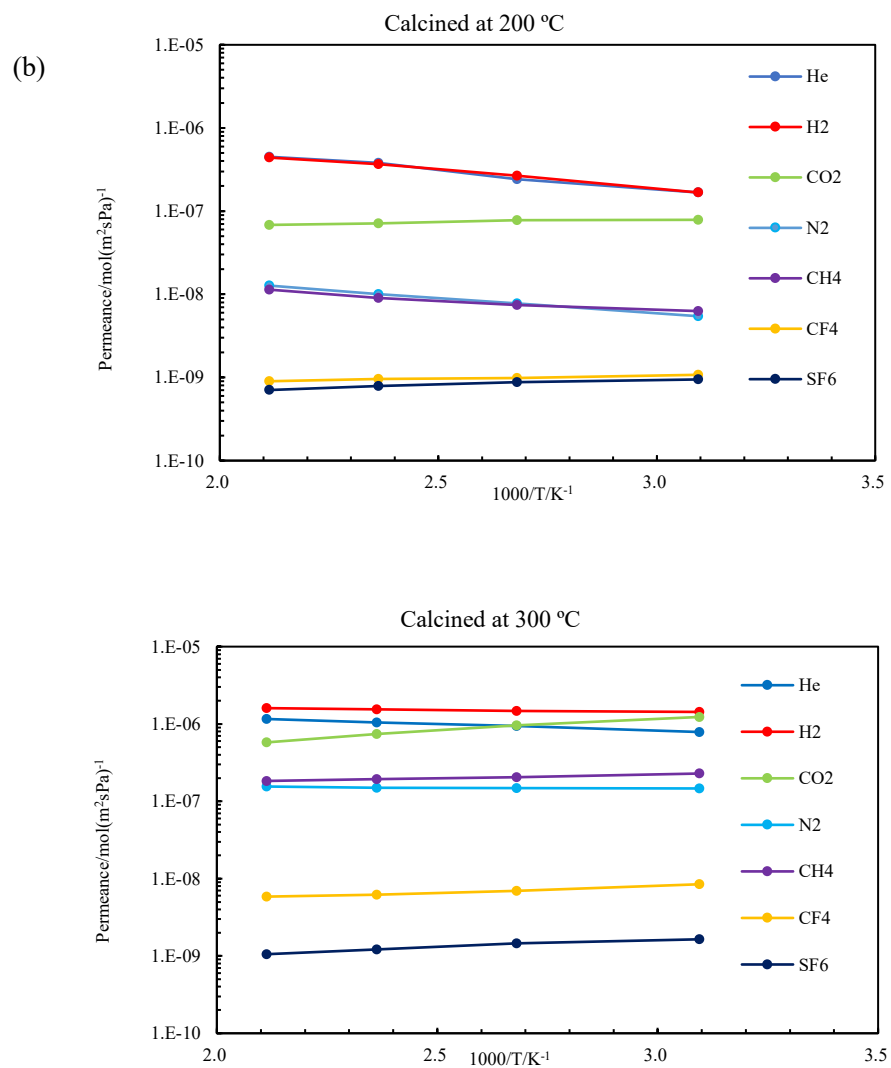

**Figure S3.** Temperature dependent gas permeances of (a) TESPS/BTESE and (b) TESPU/BTESE membranes calcined at different temperatures (continued).

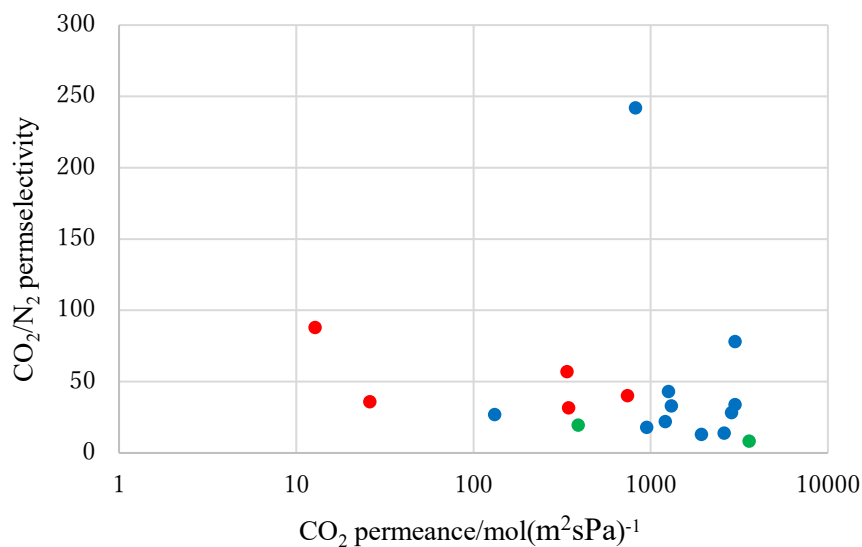

**Figure S4.** Comparison of performance of TESPS/BTESE (350) and TESP/UTESE (300) membranes (green) and that of mix-matrix-membranes (red) [1-5] and polymer-based membranes (blue) [6-12], reported previously (GPU = gas permeation unit).

**Table S1.** Activation energies for gas permeation

| precursor | calcination<br>temp/°C | $E_{act}/\text{kJmol}^{-1}$ |      |                 |                |                 |                 |                 |
|-----------|------------------------|-----------------------------|------|-----------------|----------------|-----------------|-----------------|-----------------|
|           |                        | H <sub>2</sub>              | He   | CO <sub>2</sub> | N <sub>2</sub> | CH <sub>4</sub> | CF <sub>4</sub> | SF <sub>6</sub> |
| TESPS     | 250                    | 18.1                        | 13.2 | 7.3             | 17.2           | 17.5            | 10.3            | -               |
| /BTESE    | 300                    | 12.5                        | 12.0 | 6.4             | 14.7           | 16.2            | 8.5             | -               |
|           | 350                    | 11.9                        | 10.7 | 4.4             | 10.3           | 16.4            | 5.1             | -               |
| TESPU     | 200                    | 8.3                         | 8.7  | -1.2            | 7.1            | 4.9             | -1.4            | -2.5            |
| /BTESE    | 300                    | 1.0                         | 3.2  | -6.4            | 0.5            | -1.9            | -3.2            | -3.8            |

## References

1. P.D. Sutrisna, J. Hou, M.Y. Zulkifli, H. Li, Y. Zhang, W. Liang, D.M. D'Alessandro, V. Chen, Surface functionalized UiO-66/Pebax-based ultrathin composite hollow fiber gas separation membranes, *J. Mater. Chem. A*, 6 (2018) 918-931
2. A. Ahmad, Z. Jawad, S. Low, S. Zein, A cellulose acetate/multi-walled carbon nanotube mixed matrix membrane for CO<sub>2</sub>/N<sub>2</sub> separation, *J. Membr. Sci.*, 451 (2014) 55-66.
3. Y. Dai, J. Johnson, O. Karvan, D.S. Sholl, W. Koros, Ultem®/ZIF-8 mixed matrix hollow fiber membranes for CO<sub>2</sub>/N<sub>2</sub> separations, *J. Membr. Sci.*, 401 (2012) 76-82.
4. G. Dong, X. Zhang, Y. Zhang, T. Tsuru, Enhanced permeation through CO<sub>2</sub>-stable dual-inorganic composite membranes with tunable nanoarchitected channels, *ACS Sustain. Chem. Eng.*, 6 (2018) 8515-8524.
5. Q. Fu, J. Kim, P.A. Gurr, J.M. Scofield, S.E. Kentish, G.G. Qiao, A novel cross-linked nano-coating for carbon dioxide capture, *Energy Environ. Sci.*, 9 (2016) 434-440.
6. K. Xie, Q. Fu, C. Xu, H. Lu, Q. Zhao, R. Curtain, D. Gu, P.A. Webley, G.G. Qiao, Continuous assembly of a polymer on a metal-organic framework (CAP on MOF): a 30 nm thick polymeric gas separation membrane, *Energy Environ. Sci.*, 11 (2018) 544-550.
7. S. Li, Z. Wang, C. Zhang, M. Wang, F. Yuan, J. Wang, S. Wang, Interfacially polymerized thin film composite membranes containing ethylene oxide groups for CO<sub>2</sub> separation, *J. Membr. Sci.*, 436 (2013) 121-131.
8. S. Kim, S.H. Han, Y.M. Lee, Thermally rearranged (TR) polybenzoxazole hollow fiber membranes for CO<sub>2</sub> capture, *J. Membr. Sci.*, 403 (2012) 169-178.
9. D. Nikolaeva, I. Azcune, E. Sheridan, M. Sandru, A. Genua, M. Tanczyk, M. Jaschik, K. Warmuzinski, J. Jansen, I. Vankelecom, Poly (vinylbenzyl chloride)-based poly (ionic liquids) as membranes for CO<sub>2</sub> capture from flue gas, *J. Mater. Chem. A*, 5 (2017) 19808-19818.
10. Y. Ji, M. Zhang, K. Guan, J. Zhao, G. Liu, W. Jin, High-performance CO<sub>2</sub> capture through polymer-based ultrathin membranes, *Adv. Funct. Mater.*, 29 (2019) 1900735.
11. B. Wang, Z. Qiao, J. Xu, J. Wang, X. Liu, S. Zhao, Z. Wang, M.D. Guiver, Unobstructed Ultrathin Gas Transport Channels in Composite Membranes by Interfacial Self-Assembly, *Adv. Mater.*, (2020) 1907701.
12. Z. Qiao, S. Zhao, M. Sheng, J. Wang, S. Wang, Z. Wang, C. Zhong, M.D. Guiver, Metal-induced ordered microporous polymers for fabricating large-area gas separation membranes, *Nat. Mater.*, 18 (2019) 163-168.
